# Supplementary material
Source: PubMed Central journal article supplement (PMC2766842)

Supplement Fig. 1

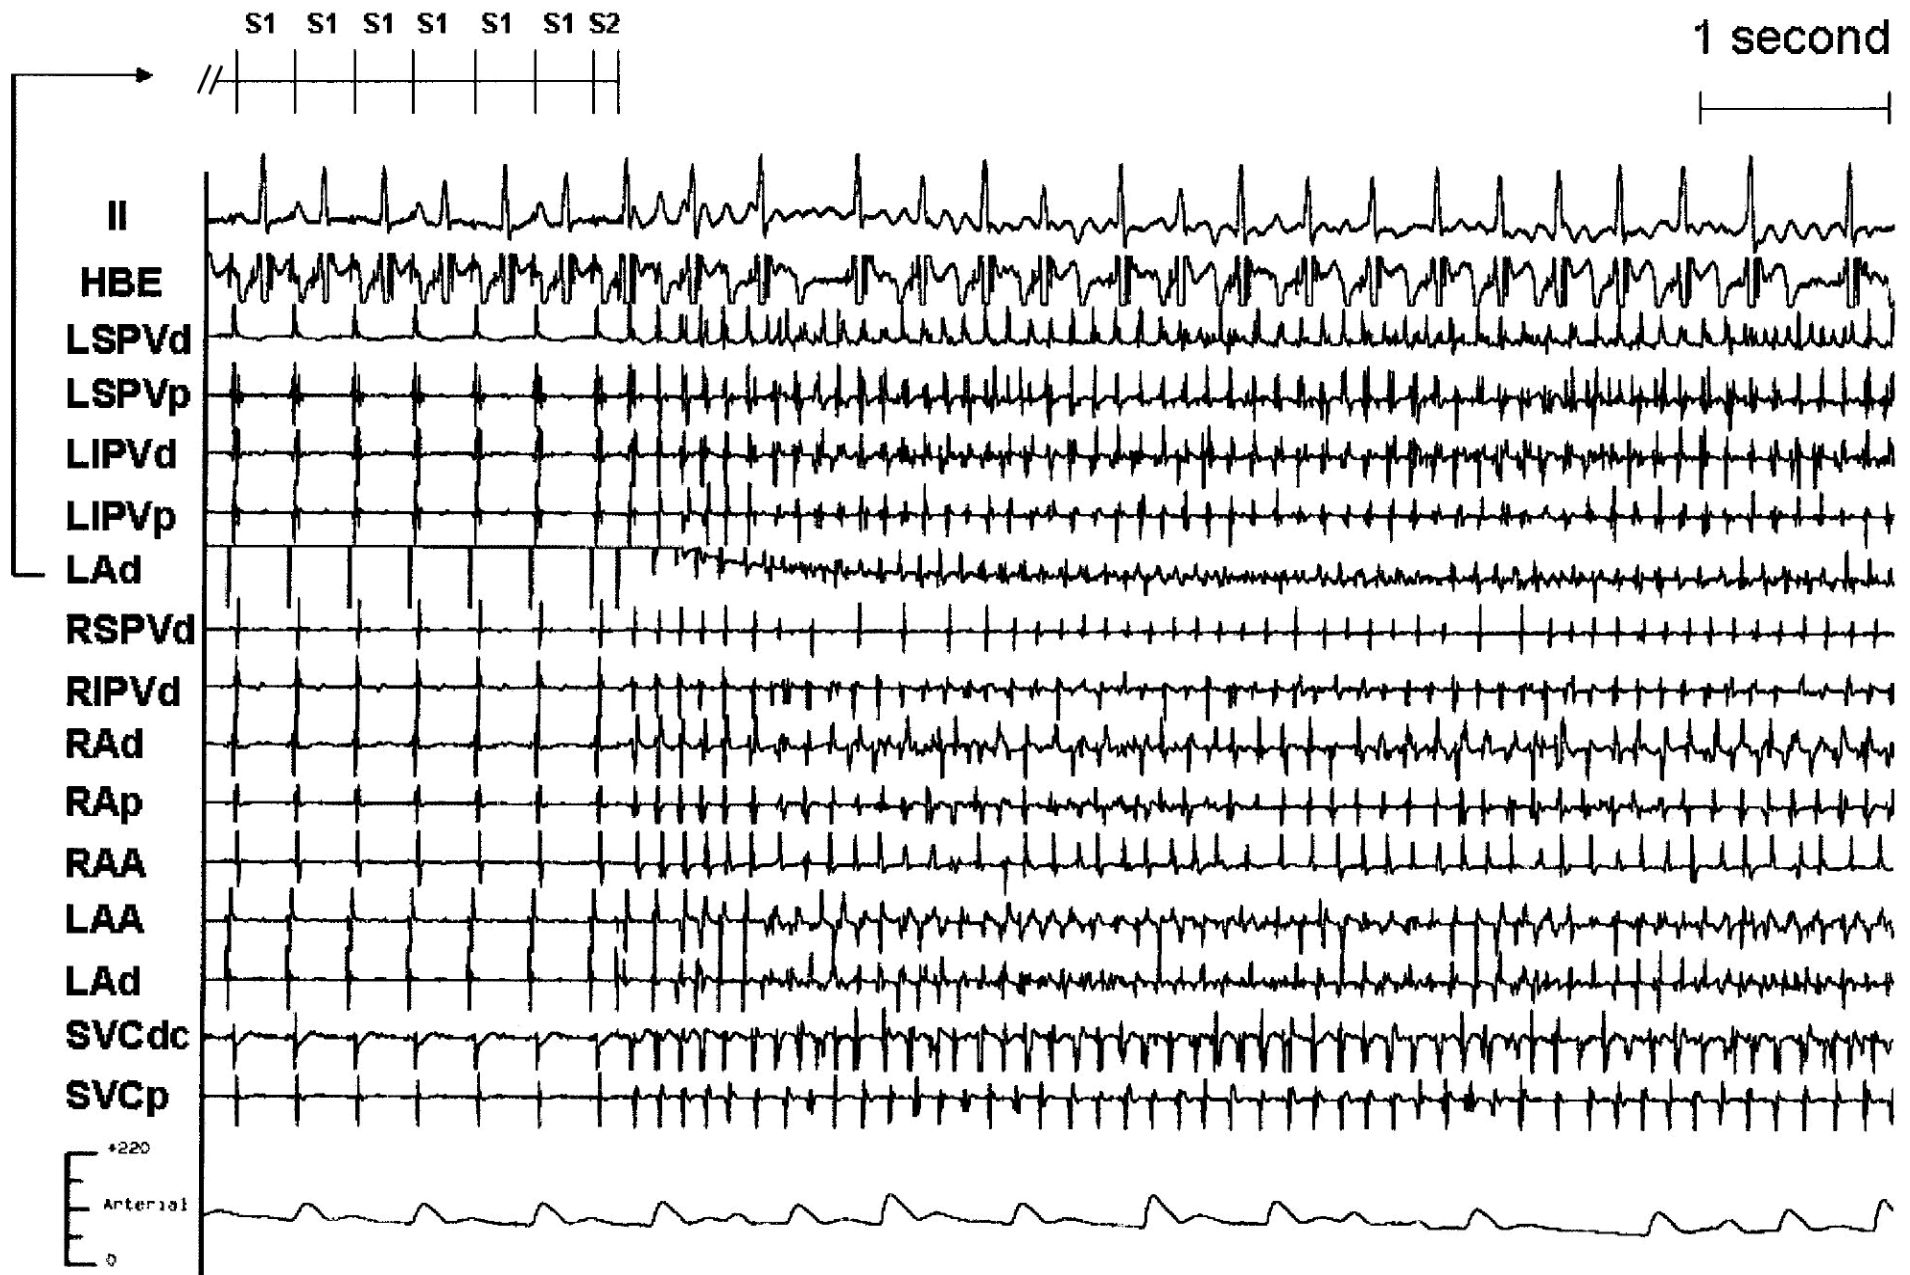

Supplement: NIHMS126580-supplement-01.pdf [file NIHMS126580-supplement-01.pdf]
